# Supplementary material for: piRNA pathway gene expression in the malaria vector mosquito Anopheles stephensi
Source: PubMed Central journal article supplement — Insect Mol Biol. 2014 Jun 19;23(5):579–86. doi: 10.1111/imb.12106 (PMC4159409; doi:10.1111/imb.12106), 2014-06-19
Supplement: NIHMS597289-supplement-Supp_TableS1-S3.pdf [file NIHMS597289-supplement-Supp_TableS1-S3.pdf]

**Table S1. Piwi gene Identification codes.**

| Gene                        | Species                    | Strain                           | Gene ID    | Tree Identifier |
|-----------------------------|----------------------------|----------------------------------|------------|-----------------|
| Ago3                        | Anopheles stephensi        | Indian strain, Astel 2.1 geneset | ASTEI04992 | AsAgo3          |
|                             |                            | SDA-500 strain, AteS 1.0 geneset | ASTE009599 | AsAgo3          |
|                             | Anopheles gambiae          | PEST, Agamp3.7 geneset           | AGAP008862 | AgAgo3          |
|                             | Aedes aegypti              | Liverpool, AaegL 1.4 geneset     | AAEL007823 | AaeAgo3         |
|                             | Drosophila melanogaster    |                                  | 3355150    | DmAgo3          |
|                             | Anopheles albimanus        | STECLA, AalbS1.1 geneset         | AALB001790 | AA1             |
|                             | Anopheles arabiensis       | Dongola, AaraD1.1 geneset        | AARA009401 | AR2             |
|                             | Anopheles christi          | ACHKN1017, AchrA1.1 geneset      | ACHR007454 | AC2             |
|                             | Anopheles darlingi         | Coari, AdarC2.2 geneset          | ADAC008631 | AD1             |
|                             | Anopheles dirus            | WRAIR2, AdirW1.1 geneset         | ADIR009721 | AI1             |
|                             | Anopheles epiroticus       | Epiroticus2, AepiE1.1 geneset    | AEPI002451 | AP1             |
|                             | Anopheles funestus         | FUMOZ, AfunF1.1 geneset          | AFUN000985 | AF1             |
|                             | Anopheles minimus A        | MINIMUS1, AminM1.1 geneset       | AMIN001620 | AM1             |
|                             |                            |                                  | AMIN001621 | AM2             |
| Anopheles quadriannulatus A | SANGWE, AquaS1.1 geneset   | AQUA007856*<br>AQUA007857        | AQ1        |                 |
| Aubergine                   | Anopheles stephensi        | Indian strain, Astel 2.1 geneset | ASTEI03833 | AsAub           |
|                             |                            | SDA-500 strain, AteS 1.0 geneset | ASTE011384 | AsAub           |
|                             | Anopheles gambiae          | PEST, Agamp3.7 geneset           | AGAP009509 | AgAub           |
|                             | Aedes aegypti              | Liverpool, AaegL 1.4 geneset     | AAEL008076 | AaePiwi1        |
|                             |                            |                                  | AAEL008098 | AaePiwi2        |
|                             |                            |                                  | AAEL013692 | AaePiwi3        |
|                             |                            |                                  | AAEL007698 | AaePiwi4        |
|                             | Drosophila melanogaster    |                                  | 34524      | DmAub           |
|                             | Anopheles arabiensis       | Dongola, AaraD1.1 geneset        | AARA011871 | AR3             |
|                             | Anopheles christi          | ACHKN1017, AchrA1.1 geneset      | ACHR004324 | AC3             |
|                             | Anopheles darlingi         | Coari, AdarC2.2 geneset          | ADAC006051 | AD3             |
|                             | Anopheles dirus            | WRAIR2, AdirW1.1 geneset         | ADIR006020 | AI4             |
|                             | Anopheles epiroticus       | Epiroticus2, AepiE1.1 geneset    | AEPI004893 | AP3             |
|                             | Anopheles funestus         | FUMOZ, AfunF1.1 geneset          | AFUN005296 | AF3             |
| Anopheles minimus           | MINIMUS1, AminM1.1 geneset | AMIN001881                       | AM4        |                 |
| Anopheles quadriannulatus A | SANGWE, AquaS1.1 geneset   | AQUA005807                       | AQ3        |                 |
| Piwi                        | Anopheles stephensi        | Indian strain, Astel 2.1 geneset | ASTEI06803 | AsPiwi          |
|                             |                            | SDA-500 strain, AteS 1.0 geneset | ASTE008262 | AsPiwi          |
|                             | Anopheles gambiae          | PEST, Agamp3.7 geneset           | AGAP011204 | AgPiwi          |
|                             | Aedes aegypti              | Liverpool, AaegL 1.4 geneset     | AAEL013233 | AaePiwi5        |
|                             |                            |                                  | AAEL013227 | AaePiwi6        |
|                             |                            |                                  | AAEL006287 | AaePiwi7        |
|                             | Drosophila melanogaster    |                                  | 34521      | DmPiwi          |
|                             | Anopheles albimanus        | STECLA, AalbS1.1 geneset         | AALB010564 | AA2             |
|                             |                            |                                  | AALB010570 | AA3             |
|                             | Anopheles ariabiensis      | Dongola, AaraD1.1 geneset        | AARA000129 | AR1             |
|                             | Anopheles christi          | ACHKN1017, AchrA1.1 geneset      | ACHR009351 | AC1             |
|                             | Anopheles darlingi         | Coari, AdarC2.2 geneset          | ADAC008732 | AD2             |
|                             | Anopheles dirus            | WRAIR2, AdirW1.1 geneset         | ADIR000087 | AI2             |
|                             |                            |                                  | ADIR000092 | AI3             |
|                             | Anopheles epiroticus       | Epiroticus2, AepiE1.1 geneset    | AEPI006652 | AP2             |
|                             | Anopheles funestus         | FUMOZ, AfunF1.1 geneset          | AFUN004060 | AF2             |
| Anopheles minimus           | MINIMUS1, AminM1.1 geneset | AMIN008377                       | AM3        |                 |
| Anopheles quadriannulatus A | SANGWE, AquaS1.1 geneset   | AQUA005063                       | AQ2        |                 |

\*Gene model in VectorBase missassigned this ortholog as two genes.

**Table S1: p-values from statistical analysis using two-sided t-tests of tissue and time point expression as measured by qPCR.**

|        |                    |        |        |        |        | Female Carcass PBM |        |        |        |        | Female Ovaries PBM |        |        |        |        |  |
|--------|--------------------|--------|--------|--------|--------|--------------------|--------|--------|--------|--------|--------------------|--------|--------|--------|--------|--|
|        |                    | Embryo | Larvae | Pupae  | Male   | 0 hr               | 2 hr   | 24 hr  | 48 hr  | 72 hr  | 0 hr               | 2 hr   | 24 hr  | 48 hr  | 72 hr  |  |
| Ago3   | Female Carcass PBM | Embryo |        |        |        |                    |        |        |        |        |                    |        |        |        |        |  |
|        |                    | Larvae | 0.0031 |        |        |                    |        |        |        |        |                    |        |        |        |        |  |
|        |                    | Pupae  | 0.5915 | 0.0988 |        |                    |        |        |        |        |                    |        |        |        |        |  |
|        |                    | Male   | 0.1256 | 0.0561 | 0.1274 |                    |        |        |        |        |                    |        |        |        |        |  |
|        |                    | 0 hr   | 0.0006 | 0.1580 | 0.0381 | 0.0472             |        |        |        |        |                    |        |        |        |        |  |
|        | Female Ovaries PBM | 2 hr   | 0.0034 | 0.7066 | 0.0954 | 0.0691             | 0.3396 |        |        |        |                    |        |        |        |        |  |
|        |                    | 24 hr  | 0.0003 | 0.0487 | 0.0270 | 0.0448             | 0.6071 | 0.1411 |        |        |                    |        |        |        |        |  |
|        |                    | 48 hr  | 0.9310 | 0.0403 | 0.5937 | 0.0411             | 0.0156 | 0.0416 | 0.0114 |        |                    |        |        |        |        |  |
|        |                    | 72 hr  | 0.0045 | 0.9389 | 0.1117 | 0.0568             | 0.1952 | 0.6896 | 0.0810 | 0.0441 |                    |        |        |        |        |  |
|        |                    | 0 hr   | 0.0130 | 0.8574 | 0.1559 | 0.0589             | 0.2992 | 0.6880 | 0.1860 | 0.0566 | 0.9061             |        |        |        |        |  |
|        | Female Carcass PBM | 2 hr   | 0.8558 | 0.0891 | 0.8016 | 0.1222             | 0.0399 | 0.0897 | 0.0303 | 0.8047 | 0.0977             | 0.1263 |        |        |        |  |
|        |                    | 24 hr  | 0.7325 | 0.0872 | 0.5364 | 0.1672             | 0.0494 | 0.0931 | 0.0409 | 0.7608 | 0.0924             | 0.1088 | 0.6752 |        |        |  |
|        |                    | 48 hr  | 0.0023 | 0.0008 | 0.0031 | 0.1450             | 0.0006 | 0.0014 | 0.0006 | 0.0001 | 0.0008             | 0.0009 | 0.0022 | 0.0034 |        |  |
|        |                    | 72 hr  | 0.0000 | 0.0000 | 0.0000 | 0.9517             | 0.0000 | 0.0000 | 0.0000 | 0.0000 | 0.0000             | 0.0000 | 0.0001 | 0.0011 | 0.0670 |  |
| Embryo |                    |        |        |        |        |                    |        |        |        |        |                    |        |        |        |        |  |
| Aub    | Female Carcass PBM | Larvae | 0.0003 |        |        |                    |        |        |        |        |                    |        |        |        |        |  |
|        |                    | Pupae  | 0.0002 | 0.6728 |        |                    |        |        |        |        |                    |        |        |        |        |  |
|        |                    | Male   | 0.0034 | 0.6012 | 0.4092 |                    |        |        |        |        |                    |        |        |        |        |  |
|        |                    | 0 hr   | 0.0000 | 0.1562 | 0.3397 | 0.1368             |        |        |        |        |                    |        |        |        |        |  |
|        |                    | 2 hr   | 0.0001 | 0.3059 | 0.5855 | 0.2340             | 0.5657 |        |        |        |                    |        |        |        |        |  |
|        | Female Ovaries PBM | 24 hr  | 0.0000 | 0.0165 | 0.0457 | 0.0419             | 0.1027 | 0.0146 |        |        |                    |        |        |        |        |  |
|        |                    | 48 hr  | 0.0000 | 0.6404 | 0.3642 | 0.8096             | 0.0647 | 0.1524 | 0.0081 |        |                    |        |        |        |        |  |
|        |                    | 72 hr  | 0.0000 | 0.0231 | 0.0670 | 0.0458             | 0.2126 | 0.0415 | 0.4714 | 0.0102 |                    |        |        |        |        |  |
|        |                    | 0 hr   | 0.8853 | 0.1226 | 0.1000 | 0.1840             | 0.0646 | 0.0952 | 0.0536 | 0.0450 | 0.0456             |        |        |        |        |  |
|        |                    | 2 hr   | 0.5716 | 0.0537 | 0.0445 | 0.0790             | 0.0301 | 0.0469 | 0.0283 | 0.0098 | 0.0222             | 0.5828 |        |        |        |  |
|        | Female Carcass PBM | 24 hr  | 0.4040 | 0.0351 | 0.0293 | 0.0518             | 0.0199 | 0.0321 | 0.0196 | 0.0045 | 0.0148             | 0.4399 | 0.8225 |        |        |  |
|        |                    | 48 hr  | 0.0067 | 0.0004 | 0.0003 | 0.0006             | 0.0002 | 0.0006 | 0.0003 | 0.0000 | 0.0002             | 0.0088 | 0.0313 | 0.0512 |        |  |
|        |                    | 72 hr  | 0.0030 | 0.0000 | 0.0000 | 0.0000             | 0.0000 | 0.0000 | 0.0000 | 0.0000 | 0.0000             | 0.1141 | 0.4935 | 0.7207 | 0.0549 |  |
|        |                    | Embryo |        |        |        |                    |        |        |        |        |                    |        |        |        |        |  |
| Larvae |                    | 0.0000 |        |        |        |                    |        |        |        |        |                    |        |        |        |        |  |
| Piwi   | Female Carcass PBM | Pupae  | 0.0000 | 0.0818 |        |                    |        |        |        |        |                    |        |        |        |        |  |
|        |                    | Male   | N/A    | N/A    | N/A    |                    |        |        |        |        |                    |        |        |        |        |  |
|        |                    | 0 hr   | 0.0000 | 0.0304 | 0.0003 | N/A                |        |        |        |        |                    |        |        |        |        |  |
|        |                    | 2 hr   | N/A    | N/A    | N/A    | N/A                | N/A    |        |        |        |                    |        |        |        |        |  |
|        |                    | 24 hr  | 0.0000 | 0.0110 | 0.0001 | N/A                | 0.2045 | N/A    |        |        |                    |        |        |        |        |  |
|        | Female Ovaries PBM | 48 hr  | N/A    | N/A    | N/A    | N/A                | N/A    | N/A    | N/A    |        |                    |        |        |        |        |  |
|        |                    | 72 hr  | 0.0000 | 0.5909 | 0.0222 | N/A                | 0.0671 | N/A    | 0.0253 | N/A    |                    |        |        |        |        |  |
|        |                    | 0 hr   | 0.0000 | 0.7588 | 0.0885 | N/A                | 0.0023 | N/A    | 0.0005 | N/A    | 0.3449             |        |        |        |        |  |
|        |                    | 2 hr   | 0.0009 | 0.0113 | 0.0769 | N/A                | 0.0023 | N/A    | 0.0009 | N/A    | 0.0057             | 0.0126 |        |        |        |  |
|        |                    | 24 hr  | 0.0000 | 0.0110 | 0.0001 | N/A                | 0.2045 | N/A    | N/A    | N/A    | 0.0253             | 0.0005 | 0.0009 |        |        |  |
|        | Female Carcass PBM | 48 hr  | 0.0514 | 0.0005 | 0.0007 | N/A                | 0.0012 | N/A    | 0.0005 | N/A    | 0.0004             | 0.0005 | 0.0017 | 0.0011 |        |  |
|        |                    | 72 hr  | 0.0000 | 0.0000 | 0.0000 | N/A                | 0.0000 | N/A    | 0.0000 | N/A    | 0.0000             | 0.0000 | 0.0000 | 0.0000 |        |  |
|        |                    | Embryo |        |        |        |                    |        |        |        |        |                    |        |        |        |        |  |
|        |                    | Larvae | 0.0000 |        |        |                    |        |        |        |        |                    |        |        |        |        |  |
| Pupae  |                    | 0.0000 | 0.0818 |        |        |                    |        |        |        |        |                    |        |        |        |        |  |

P-values less than 0.05 and 0.001 are highlighted in light and dark orange respectively. N/A indicates little or no amplification of the target gene in one of the compared samples in technical and biological replicates, which prohibited performance of the test. This occurred for Piwi amplified from male samples and female carcass samples.

**Table S3. List of primers.**

| Primers                               | 5'-3' Forward             | 5'-3' Reverse            |
|---------------------------------------|---------------------------|--------------------------|
| <b>5' RACE</b>                        |                           |                          |
| Ago3                                  | CGCGCGCACACTCGCCAACG      | CGGCCACCCCGTCGCGGAAT     |
| Ago3 Rev 2                            |                           | TGCGGGTGCAGCGCCTGA       |
| Ago3 Rev 2                            |                           | GCTGCGGCACGATGCGGGCCTGT  |
| Aub                                   | TGGCACGCGGCTTCAGGGGGA     | CGGGCTGGGACACGCCGGGA     |
| Aub Rev 1                             |                           | CGGGCTGGGACACGCCGGGACA   |
| Aub Rev 2                             |                           | TGCGCCATGCCGGGCGACGCT    |
| Piwi                                  | CCGCCCGGTCTGTGTAATCCGATGC | ATGACGGGGCCCTGCGTGCGG    |
| Piwi Rev 1                            |                           | TGCGCCGGTATCGCCGCTCCGT   |
| Piwi Rev 2                            |                           | GCTGGGGCGCGGCAGAATGCGGT  |
| <b>3' RACE</b>                        |                           |                          |
| Ago3                                  | TACTCGCGGGCCACGATCCA      | CCGGCACACGAATGGTCCCC     |
| Aub                                   | GCCGCCCGTGGCATGCGGTT      | GCCACCGCTGCGATACACACCCCG |
| Aub For1                              | TGCAAGCTCGGCGGCGTACCGT    |                          |
| Aub For 2                             | CGGCCGGCATCGAGCAGGAGGTGC  |                          |
| Aub For 4                             | GCAACATGCTCGAAAAGAACTTACT |                          |
| Piwi                                  | ACCGCACACGCGGGGCGAAGA     | ACTGGGCGGTGAGGAAGGCCAGC  |
| Piwi For 1                            | GGCGATGGGCAGCTGCGCGGTGT   |                          |
| Piwi For 2                            | ACCGCAATCCGCCGCCCGGCAC    |                          |
| <b>Quantitative PCR</b>               |                           |                          |
| Ago3                                  | AGCGTGCTCGATCATACCGT      | CGTCCCGCAGCACAATGTAG     |
| Aub                                   | CCGGGCTGACGGATTCAATG      | CGATCCGGATTGAGACGGGT     |
| Piwi                                  | GGTTCAAATCGGTGCCGCTG      | CATTCACGTACGCGTTGCCT     |
| rpS7                                  | GGTGACCTGGATAAGAACCA      | CGGCCAGTCAGTTCTTGTAC     |
| <b>Determination of cDNA sequence</b> |                           |                          |
| Ago3 1                                | CCTCTGCCAACCGGGACAGT      | CACCATTGCTCCTGCGAGA      |
| Ago3 2                                | TGTTCCGGCGCGTCATGTAT      | GTTGGCAACCTTGCCTCCT      |
| Ago3 3                                | ACAAGGAAACGCCGAGGAG       | GTTGGCAACCTTGCCTCCT      |
| Ago3 4                                | GGCGATCAAACGGCTGCTCT      | AGCCGGAGCATTCCCTAGCC     |
| Aub 1                                 | GGAGGTTATCCACCGCAAGG      | ACAGAAGCGGTTGCCAGTC      |
| Aub 2                                 | GACCCCTGGCGGATACACTG      | TACGATCGTGCCGCTGACAT     |
| Aub 3                                 | GGCAGCACGAAAACGATGTG      | TCGACGAGACGACGATCGAG     |
| Aub 4                                 | GGAGCTCGATCGTCTGCTCG      | ATCGCACCGAACGATTTGCT     |
| Aub 5                                 | AAATCGTTCCGGTGCATGGT      | TCGTGCCGGACCAATTGTAG     |
| Piwi 1A                               | GGCAACACAGCTTGCGAAGA      | GCTTGTGGGTTTGCATCTGCT    |
| Piwi 1B                               | GCTGCTGGGTGCGATTCTTT      | GCTTGTGGGTTTGCATCTGCT    |
| Piwi 2                                | GCAGCAGATGCAAACCCACA      | GGATCAGTGCTGCATGACG      |
| Piwi 3                                | TTGAGCCAACGGTGGAGGAT      | GACGAACCGTCCTTCGTGCT     |
| Piwi 4                                | CAGGTCTCGGTGCACAGGT       | AGCGGCACCGATTTGAACAT     |
| Piwi 5                                | GCACCGGAACAGATGTTCA       | TGCTTCGACGCGTACATGGT     |
| Piwi 6                                | CGAAGCAGACCGAACCGAAG      | GTCCGCCGTGAGACCACTCT     |
